# Supplementary material for: Docetaxel Skin Exposure and Micronucleation Contributes to Skin Toxicity Caused by CPC634
Source: MDPI journal article supplement (doi:10.3390/cancers13153741), 2021-07-26
Supplement: s1 [file s1]

Supplementary file

**Table S1.** Antibody information for Ki-67, CD31 and SMA staining

| Antibody | Type        | Concentration | Company | Clone |
|----------|-------------|---------------|---------|-------|
| Ki-67    | Anti-Rabbit | 2.0 µg/mL     | Ventana | 30-9  |
| CD31     | Anti-Mouse  | 0.81 µg/mL    | Ventana | JC-70 |
| SMA      | Anti-Mouse  | 0.02 µg/mL    | Ventana | 1A4   |
